# Supplementary material for: Peering below the diffraction limit: robust and specific sorting of viruses with flow cytometry
Source: PubMed Central journal article supplement (PMC5131442; doi:10.1186/s12985-016-0655-7), 2016-12-01
Supplement: 12985_2016_655_MOESM1_ESM.pdf [file 12985_2016_655_MOESM1_ESM.pdf]

| <b>Probe</b>            | <b>Sequence</b>                                        |
|-------------------------|--------------------------------------------------------|
| T4 probe                | 5'-/56-FAM/TCGCATTCT/ZEN/TCCTCTGATGGAGCA /3IABkFQ/ -3' |
| T4 FWD                  | 5'-CCACAAC TAACCGAGGAAGTAA-3'                          |
| T4 REV                  | 5'-TGCGATATGCTATGGGTCTTG-3'                            |
| Lambda probe 1          | 5'- /5Cy5/TCTGCCCGTGTCCGTTATTCCAAA/3IAbRQSp/-3'        |
| Lambda FWD 1            | 5'- GACTACATCCGTGAGGTGAATG-3'                          |
| Lambda REV 1            | 5'- TTGCGCTGCTTATGCTCTAT-3'                            |
| Lambda probe 2          | 5'- /56-FAM/TGGGTGTCTCGTATGAGCAGCTTT/3IABkFQ/-3'       |
| Lambda FWD 2            | 5'- TAACGGCTACTCCGTGTTTG-3'                            |
| Lambda REV 2            | 5'- AGCTCATCTGGGCGTAATTC-3'                            |
| Lambda probe 3          | 5'- /56-FAM/TGAGCAGAC/ZEN/CAAAGACGGCAAACA/3IABkFQ/-3'  |
| Lambda FWD 3            | 5'- TGGAAGGATGCCAGTGATAAG-3'                           |
| Lambda REV 3            | 5'- TCCATGCTGAGGCCAATA C-3'                            |
| Lambda probe 4          | 5'- /56-FAM/CTCGTTGCT/ZEN/GGAAGCCTGGAAGA/3IABkFQ/-3'   |
| Lambda FWD 4            | 5'- CAGGTAGCCAGTGAGCATATT-3'                           |
| Lambda REV 4            | 5'- GTTCAGCAACACCCGATACT-3'                            |
| Lambda probe 5          | 5'- /56-FAM/ATACTGAGC/ZEN/ACATCAGCAGGACGC/3IABkFQ/-3'  |
| Lambda FWD 5            | 5'- GCCCTTCTTCAGGGCTTAAT-3'                            |
| Lambda REV 5            | 5'- CTCTGGCGGTGTTGACATAA-3'                            |
| Lambda probe 6          | 5'- /56-FAM/TATCCGTCA/ZEN/GGCAATCGACCGTTG/3IABkFQ/-3'  |
| Lambda FWD 6            | 5'- GTGGCATTGCAGCAGATTAAG-3'                           |
| Lambda REV 6            | 5'- GGCAGTGAAGCCAGATATT-3'                             |
| <b>Primers for qPCR</b> | <b>Sequence</b>                                        |
| T4 FWD                  | 5'-ACCCGGACCAAATCTCGAC-3'                              |
| T4 REV                  | 5'-GCGCAGTAGTCCGTGAATTG-3'                             |
| ΦX174 FWD               | 5'-TTCTGTGCCGCGTTTCTTTG-3'                             |
| ΦX174 REV               | 5'-AAACAGGGTCGCCAGCAATA-3'                             |
| Lambda FWD              | 5'-CGTGATGGAGCAGATGAAGAT-3'                            |
| Lambda REV              | 5'-GTATCCAGCTCACTCTCAATGG-3'                           |

**Key:**

/56-FAM/ - isomer derivative of fluorescein attachment for oligonucleotides

/5Cy5/ - Cy5 fluorescent dye attachment for oligonucleotides

/ZEN/ - internal quencher for TaqMan and qPCR probes

/3IABkFQ/ - Iowa Black quencher ideal for use with fluorescein

/3IAbRQSp/ - Iowa Black quencher ideal for use with Cy5

**Supplemental Table 1**

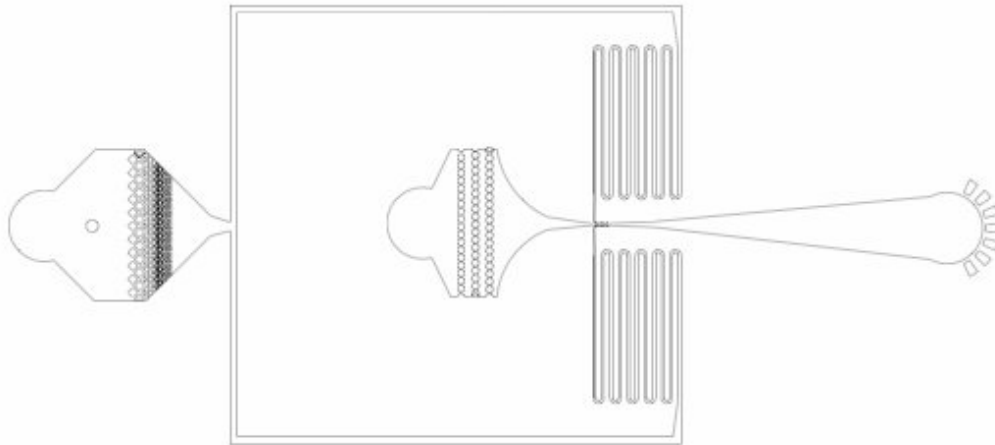

**Supplemental Figure 1** – Diagram of single emulsion dropmaker.

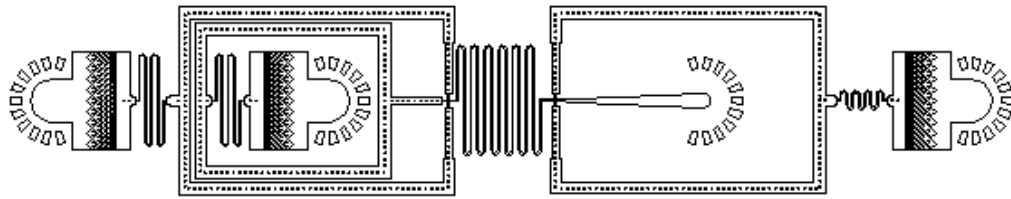

**Supplemental Figure 2** – Diagram of double emulsion dropmaker.

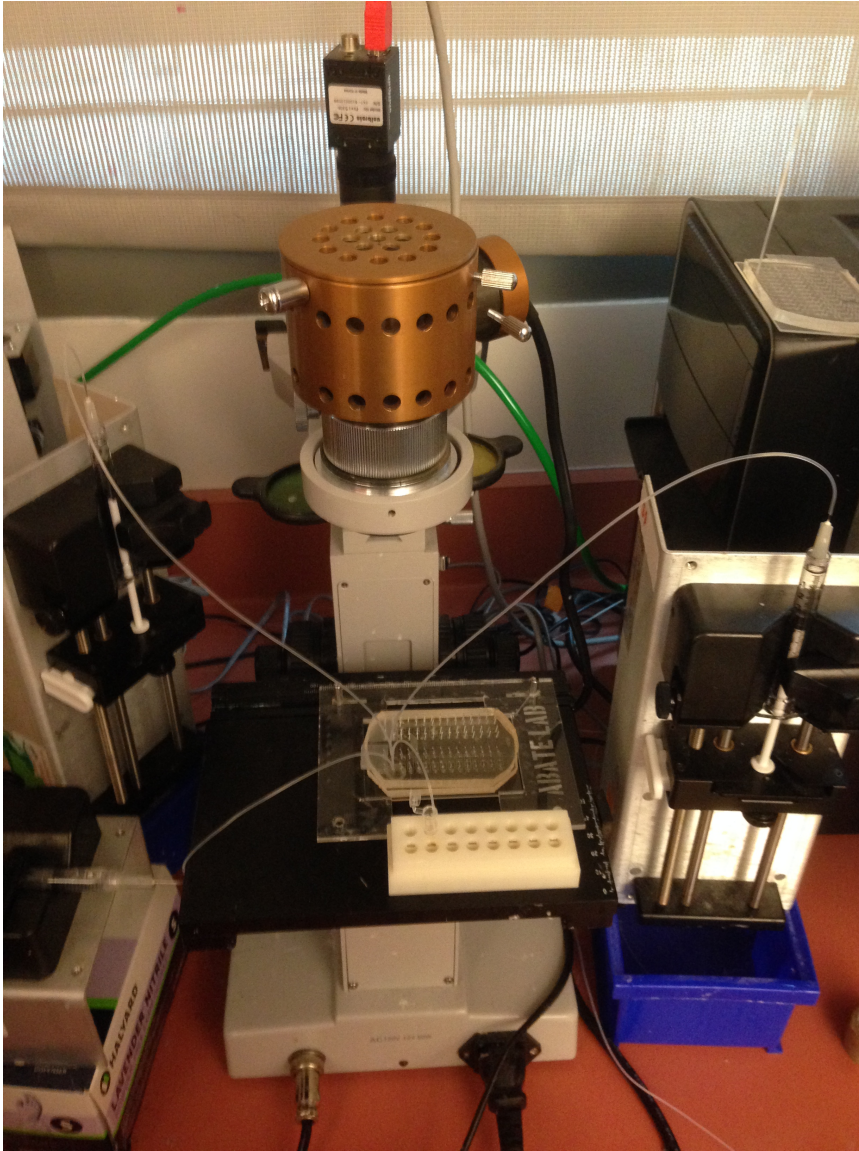

*Supplemental Figure 3* - Image of dropstation.

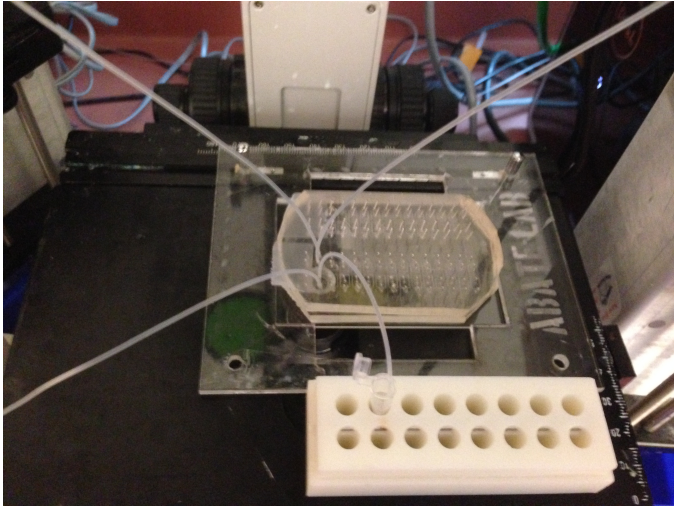

***Supplemental Figure 4*** – Close-up image of dropstation.
